# Supplementary material
Source: MDPI journal article supplement (https://www.mdpi.com/2673-6497/2/2/13)
Supplement: s1 [file s1]

# Characterisation and Traceability of Calcium Carbonate from the Seaweed *Lithothamnium calcareum*

## SUPPLEMENTARY INFORMATION

Quantachrome NovaWin - Data Acquisition and Reduction  
for NOVA instruments  
©1994-2013, Quantachrome Instruments  
version 11.03

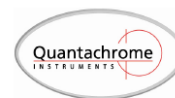

|                   |                       |                |                          |
|-------------------|-----------------------|----------------|--------------------------|
| <b>Analysis</b>   |                       | <b>Report</b>  |                          |
| Operator:         | Jefferson             | Operator:      | quantachrome             |
| Sample ID:        | LITHO02               | Filename:      | LITHO02_B_20170510_1.qps |
| Sample Desc:      |                       | Comment:       |                          |
| Sample weight:    | 1.5134 g              | Sample Volume: | 0.44381 cc               |
| Outgas Time:      | 0.0 hrs               | Outgas Temp:   | 0.0 C                    |
| Analysis gas:     | Nitrogen              | Bath Temp:     | 273.0 K                  |
| Press. Tolerance: | 0.100/0.100 (ads/des) | Equil time:    | 60/60 sec (ads/des)      |
| Analysis Time:    | 337.6 min             | End of run:    | 2017/05/11 20:14:10      |
| Cell ID:          | 2                     |                |                          |

### Multi-Point BET Plot

| Adsorbate          |  | Data Reduction Parameters |            |
|--------------------|--|---------------------------|------------|
| Nitrogen           |  | Temperature               | 77.350K    |
| Molec. Wt.: 28.013 |  | Cross Section:            | 16.200 Å²  |
|                    |  | Liquid Density:           | 0.808 g/cc |

|   |    |
|---|----|
| A | BF |
|---|----|

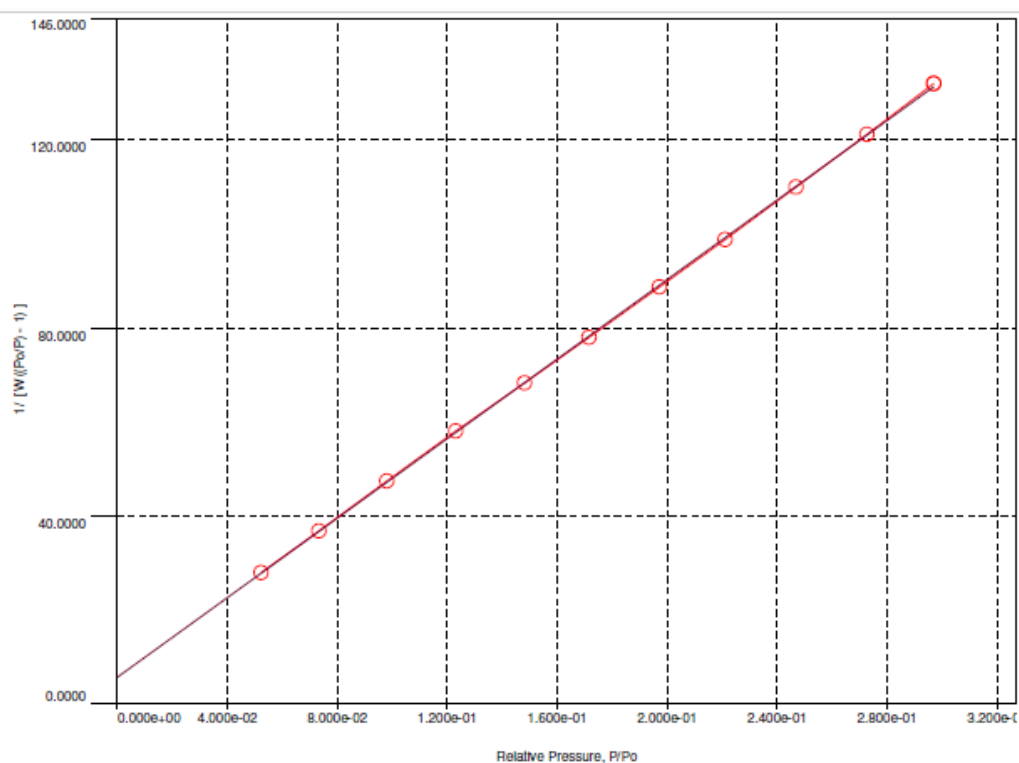

| BET summary                  |            |
|------------------------------|------------|
| Slope =                      | 423.270    |
| Intercept =                  | 5.715e+00  |
| Correlation coefficient, r = | 0.999952   |
| C constant =                 | 75.065     |
| Surface Area =               | 8.118 m²/g |

Quantachrome NovaWin - Data Acquisition and Reduction for NOVA instruments ©1994-2013, Quantachrome Instruments version 11.03

Report id:[162844810:20180613 142516781] Page 1 of 1

**Figure S1.** Multi-Point BET graphs of the *Lithothamnium calcareum* calcium carbonate sample and data summaries.

# Characterisation and Traceability of Calcium Carbonate from the Seaweed *Lithothamnium calcareum*

Quantachrome NovaWin2 - Data Acquisition and Reduction  
for NOVA instruments  
©1994-2007, Quantachrome Instruments  
version 9.0

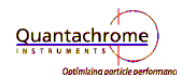

## Analysis

Operator: Jefferson  
Sample ID: Carbonato\_de\_C  
Sample Desc: Fabricante  
Sample weight: 1.077 g  
Outgas Time: 3.0 hrs  
Analysis gas: Nitrogen  
Press. Tolerance: 0.100/0.100 (ads/des)  
Analysis Time: 488.4 min  
Cell ID: 1

Date: 2017/02/02

Filename: C:\QCdata\Physisorb\Carbonato\_de\_Calcio\_Leve.qps  
Comment:  
Sample Volume: 1.07229 cc  
Outgas Temp: 300.0 C  
Bath Temp: 77.3 K  
Equil time: 60/60 sec (ads/des)  
End of run: 2017/02/02 16:01:15

## Report

Operator: Date: 2/3/2017  
C:\QCdata\Physisorb\Carbonato\_de\_Calcio\_Leve.qps

Equil timeout: 240/240 sec (ads/des)  
Instrument: Nova Station B

## Multi-Point BET Plot

| Data Reduction Parameters |                      |                 |            |
|---------------------------|----------------------|-----------------|------------|
| Adsorbate                 | Nitrogen             | Temperature     | 77.350K    |
|                           | Molec. Wt.: 28.013 g | Cross Section:  | 16.200 Å²  |
|                           |                      | Liquid Density: | 0.808 g/cc |

|   |   |    |
|---|---|----|
| A | D | BF |
|---|---|----|

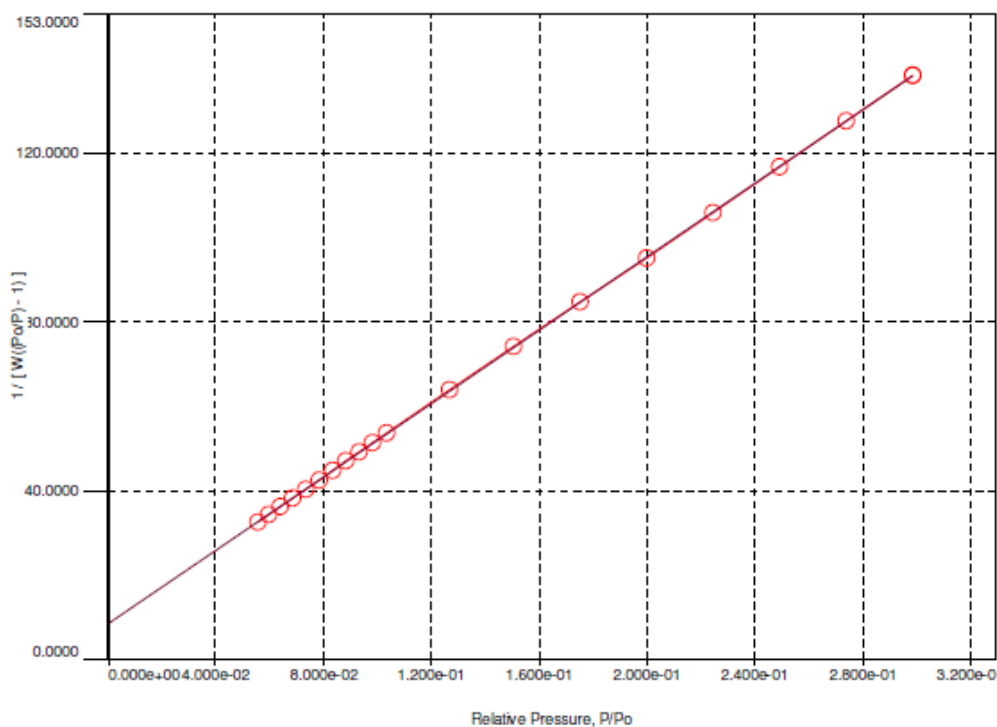

| BET summary                  |            |
|------------------------------|------------|
| Slope =                      | 434.782    |
| Intercept =                  | 8.478e+00  |
| Correlation coefficient, r = | 0.999989   |
| C constant =                 | 52.281     |
| Surface Area =               | 7.857 m²/g |

**Figure S2.** Multi-Point BET graphs of the inorganic mineral calcium carbonate sample and data summaries.

# Characterisation and Traceability of Calcium Carbonate from the Seaweed *Lithothamnium calcareum*

Quantachrome NovaWin - Data Acquisition and Reduction  
for NOVA instruments  
©1994-2013, Quantachrome Instruments  
version 11.03

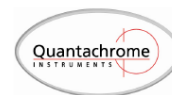

|                   |                       |                |                         |
|-------------------|-----------------------|----------------|-------------------------|
| <b>Analysis</b>   |                       | <b>Report</b>  |                         |
| Operator:         | quantachrome          | Operator:      | quantachrome            |
| Sample ID:        | Sarm2005              | Filename:      | CaCO3 ostras 080618.qps |
| Sample Desc:      | Lote2116              | Comment:       |                         |
| Sample weight:    | 1.462 g               | Sample Volume: | 0.79336 cc              |
| Outgas Time:      | 0.0 hrs               | Outgas Temp:   | 0.0 C                   |
| Analysis gas:     | Nitrogen              | Bath Temp:     | 273.0 K                 |
| Press. Tolerance: | 0.100/0.100 (ads/des) | Equil time:    | 60/60 sec (ads/des)     |
| Analysis Time:    | 132.0 min             | End of run:    | 2018/06/08 15:34:29     |
| Cell ID:          | 1                     |                |                         |

## Multi-Point BET Plot

| Adsorbate          |  | Data Reduction Parameters |            |
|--------------------|--|---------------------------|------------|
| Nitrogen           |  | Temperature               | 77.350K    |
| Molec. Wt.: 28.013 |  | Cross Section:            | 16,200 Å²  |
|                    |  | Liquid Density:           | 0.808 g/cc |

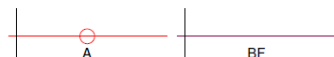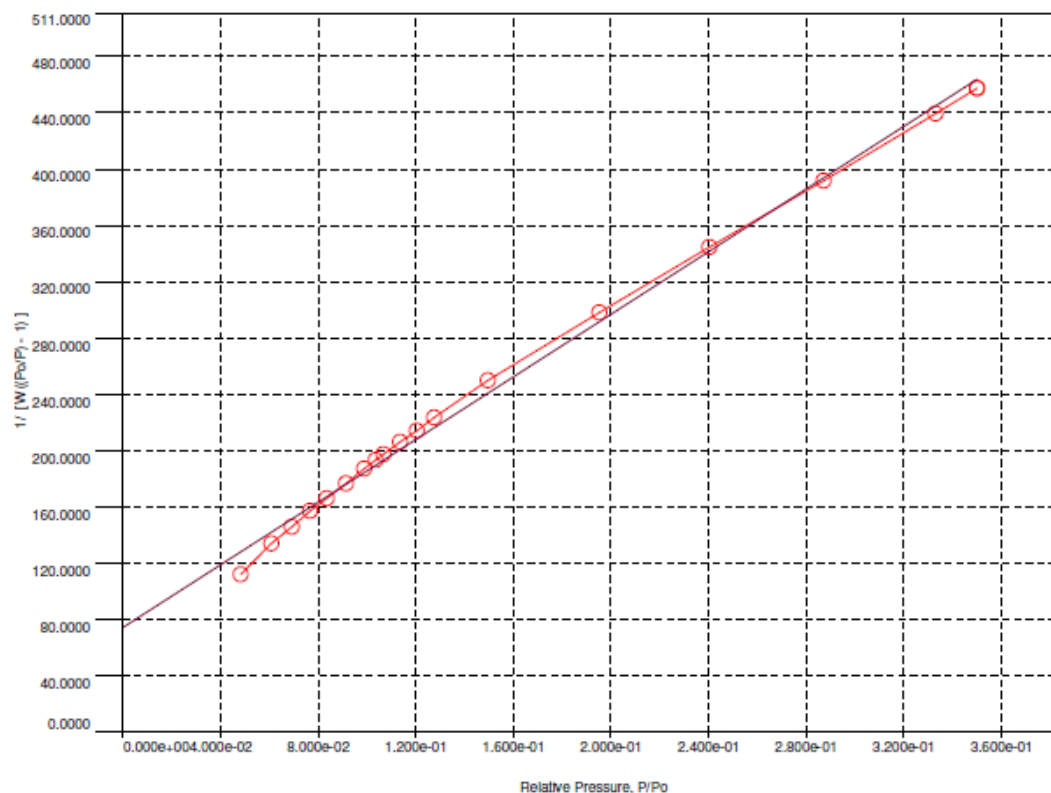

| BET summary                  |            |
|------------------------------|------------|
| Slope =                      | 1112.187   |
| Intercept =                  | 7.452e+01  |
| Correlation coefficient, r = | 0.998042   |
| C constant =                 | 15.925     |
| Surface Area =               | 2.935 m²/g |

**Figure S3.** Multi-Point BET graphs of the oyster shell calcium carbonate sample and data summaries.

# Characterisation and Traceability of Calcium Carbonate from the Seaweed *Lithothamnium calcareum*

## Statistical analysis

Tables from the results of the main component graphs for *L. calcareum*, inorganic mineral and oyster shell CaCO<sub>3</sub> samples and the two-dimensional graph of the main components. Both factors 1 and 2 correspond to 100% of the information contained in the original variables.

**Table S1.** Factor coordinates of the variables, based on correlations (Multivariate data).

| Variable                  | Factor 1  | Factor 2  |
|---------------------------|-----------|-----------|
| Compressibility index (%) | -0.914506 | -0.404573 |
| Surface area              | 0.881762  | -0.471695 |
| Pore Volume               | -0.988762 | -0.149499 |
| Pore size                 | 0.050866  | -0.998705 |
| Melting point (°C)        | -0.950644 | -0.310285 |
| Mass loss (%)             | -0.762179 | 0.647366  |
| Particle microscopy       | 0.979578  | -0.201066 |
| Calcium content (%)       | -0.996576 | 0.082687  |
| Polymorphs                | 0.872120  | 0.489293  |

**Table S2.** Factor coordinates of cases, based on correlations (Multivariate data).

| Case | Factor 1 | Factor 2 |
|------|----------|----------|
| A    | 2.62449  | 0.83953  |
| B    | -0.03708 | -1.71567 |
| C    | -2.58742 | 0.87614  |

**Table S3.** Eigenvalues of correlation matrix, and related statistics (Multivariate data)

Active variables only

| Value number | Eigenvalue | % Total  | Cumulative | Cumulative |
|--------------|------------|----------|------------|------------|
| 1            | 6.792031   | 75.46701 | 6.792031   | 75.4670    |
| 2            | 2.207969   | 24.53299 | 9.000000   | 100.0000   |

**Characterisation and Traceability of Calcium Carbonate from the  
Seaweed *Lithothamnium calcareum***

**Table S4.** Factor score coefficients, based on correlations (Multivariate data)

| Variable                  | Factor 1  | Factor 2  |
|---------------------------|-----------|-----------|
| Compressibility index (%) | -0.134644 | -0.183233 |
| Surface area              | 0.129823  | -0.213633 |
| Pore Volume               | -0.145577 | -0.067709 |
| Pore size                 | 0.007489  | -0.452319 |
| Melting point (° C)       | -0.139965 | -0.140529 |
| Mass loss (%)             | -0.112217 | 0.293195  |
| Particle microscopy       | 0.144225  | -0.091064 |
| Calcium contente (%)      | -0.146727 | 0.037449  |
| Polymorphs                | 0.128403  | 0.221603  |

**Table S5.** Summary statistics (Multivariate data)

| Variable                  | Mean     | Std. Dev. |
|---------------------------|----------|-----------|
| Compressibility index (%) | 42.0300  | 2.853366  |
| Surface area              | 6.3033   | 2.919980  |
| Pore Volume               | 3.4983   | 1.771302  |
| Pore size                 | 5.7050   | 3.506611  |
| Melting point (° C)       | 729.0333 | 7.710599  |
| Mass loss (%)             | 41.0000  | 1.493318  |
| Particle microscopy       | 2.6667   | 1.527525  |
| Calcium contente (%)      | 39.2633  | 2.501206  |
| Polymorphs                | 1.6667   | 1.154701  |

# Characterisation and Traceability of Calcium Carbonate from the Seaweed *Lithothamnium calcareum*

**Table S6.** Correlations (multivariate data).

| Variable                  | Compressibility index (%) | Surface area | Pore Volume | Pore size | Melting point (° C) | Mass loss (%) | Particle microscopy | Calcium content (%) | Polymorphs |
|---------------------------|---------------------------|--------------|-------------|-----------|---------------------|---------------|---------------------|---------------------|------------|
| Compressibility index (%) | 1.000000                  | -0.615541    | 0.964712    | 0.357532  | 0.994902            | 0.435111      | -0.814484           | 0.877921            | -0.995513  |
| Surface area              | -0.615541                 | 1.000000     | -0.801334   | 0.515936  | -0.691881           | -0.977420     | 0.958596            | -0.917745           | 0.538205   |
| Pore Volume               | 0.964712                  | -0.801334    | 1.000000    | 0.099011  | 0.986348            | 0.656833      | -0.938510           | 0.973014            | -0.935468  |
| Pore size                 | 0.357532                  | 0.515936     | 0.099011    | 1.000000  | 0.261528            | -0.685297     | 0.250633            | -0.133272           | -0.444298  |
| Melting point (° C)       | 0.994902                  | -0.691881    | 0.986348    | 0.261528  | 1.000000            | 0.523693      | -0.868842           | 0.921732            | -0.980895  |
| Mass loss (%)             | 0.435111                  | -0.977420    | 0.656833    | -0.685297 | 0.523693            | 1.000000      | -0.876777           | 0.813098            | -0.347960  |
| Particle microscopy       | -0.814484                 | 0.958596     | -0.938510   | 0.250633  | -0.868842           | -0.876777     | 1.000000            | -0.992849           | 0.755929   |
| Calcium content (%)       | 0.877921                  | -0.917745    | 0.973014    | -0.133272 | 0.921732            | 0.813098      | -0.992849           | 1.000000            | -0.828675  |
| Polymorphs                | -0.995513                 | 0.538205     | -0.935468   | -0.444298 | -0.980895           | -0.347960     | 0.755929            | -0.828675           | 1.000000   |

**Characterisation and Traceability of Calcium Carbonate from the  
Seaweed *Lithothamnium calcareum***

**Table S7.** Trace element data from samples normalized by carbonaceous chondrite from A (*L. calcareum*), B (Inorganic mineral) and C (oysters shell) CaCO<sub>3</sub> samples obtained in ppm values.

| Trace elements | A      | B      | C      |
|----------------|--------|--------|--------|
| Sc             | 0.09   | 0.01   | 0.01   |
| Rb             | 0.41   | 0.14   | 0.05   |
| Sr             | 424.20 | 223.00 | 119.72 |
| Y              | 1.09   | 0.43   | 0.06   |
| Zr             | 0.30   | 0.19   | 0.02   |
| Nb             | 1.67   | 0.26   | 0.37   |
| Cs             | 0.24   | 0.05   | 0.05   |
| Ba             | 3.01   | 6.58   | 0.21   |
| La             | 6.88   | 0.64   | 0.69   |
| Ce             | 6.04   | 0.02   | 0.02   |
| Pr             | 3.85   | 0.43   | 0.28   |
| Nd             | 2.92   | 0.36   | 0.20   |
| Sm             | 1.73   | 0.27   | 0.11   |
| Eu             | 0.89   | 0.20   | 0.18   |
| Gd             | 1.20   | 0.27   | 0.10   |
| Tb             | 0.90   | 0.28   | 0.28   |
| Dy             | 0.81   | 0.24   | 0.05   |
| Ho             | 0.76   | 0.28   | 0.18   |
| Er             | 0.67   | 0.26   | 0.06   |
| Tm             | 0.65   | 0.40   | 0.40   |
| Yb             | 0.58   | 0.24   | 0.06   |
| Lu             | 0.57   | 0.40   | 0.40   |
| Hf             | 0.33   | 0.11   | 0.10   |
| Pb             | 0.39   | 0.06   | 0.01   |
| Th             | 15.52  | 1.61   | 0.44   |
| U              | 164.30 | 75.84  | 3.42   |
